# Supplementary material for: On the Price Dynamics of a Two-Dimensional Financial Market Model with Entry Levels
Source: Hindawi journal article supplement (doi:10.1155/2020/3654083), 2020-08-07
Supplement: f1 [file 3654083.f1.zip]

Archive with 13 entries (12 files):
- 3654083.f1/the supplementary information files/
- 3654083.f1/the supplementary information files/attr.m
- 3654083.f1/the supplementary information files/bbm.m
- 3654083.f1/the supplementary information files/bcb.m
- 3654083.f1/the supplementary information files/bound.m
- 3654083.f1/the supplementary information files/finac-mark.lua
- 3654083.f1/the supplementary information files/fm2lss.lua
- 3654083.f1/the supplementary information files/manifold.m
- 3654083.f1/the supplementary information files/manifold1.m
- 3654083.f1/the supplementary information files/manifold2.m
- 3654083.f1/the supplementary information files/period.m
- 3654083.f1/the supplementary information files/preborder.m
- 3654083.f1/the supplementary information files/rigionfix.m
