# Supplementary material for: On the Price Dynamics of a Two-Dimensional Financial Market Model with Entry Levels
Source: Hindawi journal article supplement (doi:10.1155/2020/3654083), 2020-08-07
Supplement: f1 [file 3654083.f1.zip › 3654083.f1/the supplementary information files/attr.m]

clear
sb=0.8;
s1=-3.9;
s3=0.6;
a=1+sb+s1;
b=1+sb+s1+s3;
u0=-0.3;
v0=-3.7;
axis([-2,2,-2,2]);
hold on
	for i=1:100000
        if abs(u0)<1
         	a1=a*u0+v0;
            a2=-sb*u0;
        else
           a1=b*u0+v0;
            a2=-sb*u0;
        end
         u0=a1;
         v0=a2;
    end     
   for i=1:2000
        if abs(u0)<1
         	a1=a*u0+v0;
            a2=-sb*u0;
        else
           a1=b*u0+v0;
           a2=-sb*u0;
        end
         u0=a1;
         v0=a2;
    %x(i)=i;
   x(i)=u0;
   y(i)=v0;
   end
plot(x,y,'r.','markersize',0.5);
t=-3:0.001:3;
sm=-sb-(a/sb)*t;
so=sb-(b/sb)*t;
%plot(sm,t,'b');
%plot(so,t,'k');
%sm1=-sb^2/a-(1/a-a/sb)*t;
sm2=-sb^2/a-(1/a-b/sb)*t;
%plot(sm1,t,'b');
%plot(sm2,t,'k');

%plot(x,y,'b.');
%plot(a0,a1,'r.')
box,xlabel('x'),ylabel('y'),title('s^b=0.8,s^1=-3.9,s^2=0.6')
hold off   
