# Supplementary material for: On the Price Dynamics of a Two-Dimensional Financial Market Model with Entry Levels
Source: Hindawi journal article supplement (doi:10.1155/2020/3654083), 2020-08-07
Supplement: f1 [file 3654083.f1.zip › 3654083.f1/the supplementary information files/bbm.m]

sb=0.5;
%s1=-1.8;
s1=-2.5;
s2=-0.6;
m=0.5;
sig=1;%-1 or 1
%axis([-2,2,-5,1]);
axis([-5,5,-9,5]);
hold on
z=-15:0.001:15;
w=1;%the border 
w1=-1;%the border 
s=sb;
t=-sb;
plot(w,z,'b');%draw the border 
plot(w1,z,'r');%draw the border 
plot(z,s);
plot(z,t);
u1=-1:0.0001:1;
u2=-15:0.0001:-1;
u3=1:0.0001:15;
a=1+sb+s1;
b=1+sb+s1+s2;
x1=sig-m-a*u1;
x2=sig-m-b*u2;
x3=sig-m-b*u3;
plot(u1,x1,'k');%draw the first order preimages of the border
plot(u2,x2,'k');%draw the first order preimages of the border
plot(u3,x3,'k');%draw the first order preimages of the border

y1=(sig-m)/a-m+[sb/a-a]*u1;
y2=(sig-m)/a-m+[sb/a-b]*u2;
y3=(sig-m)/a-m+[sb/a-b]*u3;
plot(u1,y1,'r');%draw the second order preimages of the border
plot(u2,y2,'r');%draw the second order preimages of the border
plot(u3,y3,'r');%draw the second order preimages of the border

z1=((sig-m)/a-m)/(a^2-sb)-m+[2*a*sb-a^3]/(a^2-sb)*u1;
z2=((sig-m)/a-m)/(a^2-sb)-m+[(a+b)*sb-b*a^2]/(a^2-sb)*u2;
z3=((sig-m)/a-m)/(a^2-sb)-m+[(a+b)*sb-b*a^2]/(a^2-sb)*u3;
plot(u1,z1,'b');%draw the third order preimages of the border
plot(u2,z2,'b');%draw the third order preimages of the border
plot(u3,z3,'b');%draw the third order preimages of the border

v1=(((sig-m)/a-m)/(a^2-sb)-m)/(a^3-2*a*sb)-m-[a^4-3*a^2*sb+sb^2]/(a^3-2*a*sb)*u1;
v2=(((sig-m)/a-m)/(a^2-sb)-m)/(a^3-2*a*sb)-m-[b*a^3-2*a*b*sb-a^2*sb+sb^2]/(a^3-2*a*sb)*u2;
v3=(((sig-m)/a-m)/(a^2-sb)-m)/(a^3-2*a*sb)-m-[b*a^3-2*a*b*sb-a^2*sb+sb^2]/(a^3-2*a*sb)*u3;
plot(u1,v1,'m');%draw the fouth order preimages of the border
plot(u2,v2,'m');%draw the fouth order preimages of the border
plot(u3,v3,'m');%draw the fouth order preimages of the border
plot(-m/s1,sb*m/s1,'r')
plot(-m/(s1+s2),sb*m/(s1+s2),'b')
box,xlabel('x'),ylabel('y'),title('s^b=0.8,s^1=-3.1,s^2=3')

hold off
