# Supplementary material for: On the Price Dynamics of a Two-Dimensional Financial Market Model with Entry Levels
Source: Hindawi journal article supplement (doi:10.1155/2020/3654083), 2020-08-07
Supplement: f1 [file 3654083.f1.zip › 3654083.f1/the supplementary information files/bcb.m]

clear
s2=2;
syms sb s1;
sig=-1
q=1;
p=4;
AM=[1+sb+s1 1;-sb 0];
AO=[1+sb+s1+s2 1;-sb 0];
per=det(eye(size(AM))-AM^q*AO^p)-sig
%pretty(simplify(per))
axis([-5,-1,0,1]);
box
hold on
%x=1,BCB
h=ezplot('-3-2*sb-4*s1-2*sb*s1-s1^2',[-5,-1,0,1])%OM 
set(h,'Color','r')
h=ezplot('-9-15*s1-8*sb-4*sb^2-11*sb*s1-7*s1^2-3*sb^2*s1-3*sb*s1^2-s1^3',[-5,-1,0,1])%OOM
set(h,'Color','b')
h=ezplot('-27-4*s1^3*sb-6*sb^2*s1^2-4*sb^3*s1-54*s1-6*sb^3-30*sb-18*sb^2-52*sb*s1-36*s1^2-22*sb^2*s1-26*sb*s1^2-10*s1^3-s1^4',[-5,-1,0,1])%3OM
set(h,'Color','k')
h=ezplot('-81-5*s1^4*sb-10*sb^2*s1^3-10*sb^3*s1^2-5*sb^4*s1-47*s1^3*sb-63*sb^2*s1^2-37*sb^3*s1-189*s1-8*sb^4-32*sb^3-108*sb-76*sb^2-225*sb*s1-162*s1^2-125*sb^2*s1-159*sb*s1^2-66*s1^3-13*s1^4-s1^5',[-5,-1,0,1])%4OM
set(h,'Color','m')
%x=-1,BCB


h=ezplot('-81-5*s1^4*sb-10*sb^2*s1^3-10*sb^3*s1^2-5*sb^4*s1-47*s1^3*sb-63*sb^2*s1^2-37*sb^3*s1-189*s1-8*sb^4-32*sb^3-108*sb-76*sb^2-225*sb*s1-162*s1^2-125*sb^2*s1-159*sb*s1^2-66*s1^3-13*s1^4-s1^5',[-5,-1,0,1])%4OM
set(h,'Color','m')

%h=ezplot('-3-7*s1-2*sb-2*sb^2-7*sb*s1-5*s1^2-3*sb^2*s1-3*sb*s1^2-s1^3',[-5,-1,0,1])%OMM
%set(h,'Color','m')
