# Supplementary material for: On the Price Dynamics of a Two-Dimensional Financial Market Model with Entry Levels
Source: Hindawi journal article supplement (doi:10.1155/2020/3654083), 2020-08-07
Supplement: f1 [file 3654083.f1.zip › 3654083.f1/the supplementary information files/bound.m]

axis([-3,3,-9,1]);
%axis([-10,10,-10,10]);
%axis([-0.2,0.2,-0.2,0.2]);
axis square;
sb=0.9;
s1=1;
s2=-3;
m=1;
hold on
AM=[1+sb+s1 1;-sb 0];
AO=[1+sb+s1+s2 1;-sb 0]; 
e1=[1,0]';
[VM,DM] = eig(AM)
[VO,DO] = eig(AO)
[VOM,DOM] = eig(AO*AM)
[VMO,DMO] = eig(AM*AO)

[VMOM,DMOM] = eig(AM*AO*AM)
[VOMM,DOMM] = eig(AM*AM*AO)
[VMMO,DMMO] = eig(AO*AM*AM)

[VOMO,DOMO] = eig(AO*AM*AO)

[-m/s1 sb*m/s1]
[-m/(s1+s2) sb*m/(s1+s2)] 
MOM=inv(eye(size(AM))-AM*AO*AM)*m*(AM*AO+AM+eye(size(AM)))*e1%3 periodic point MOM
OMM=AM*MOM+m*e1%3 periodic point OMM
MMO=AO*OMM+m*e1%3 periodic point MMO

%draw stable and unstable manifolds of O
xO=-70:0.01:70;
yOu=VO(2,1).*(xO+m/(s1+s2))./VO(1,1)+sb*m/(s1+s2);
yOs=VO(2,2).*(xO+m/(s1+s2))./VO(1,2)+sb*m/(s1+s2);
%plot(xO,yOu,'k--',xO,yOs,'-','markersize',0.5)
plot(MOM(1),MOM(2))
plot(OMM(1),OMM(2),'r')
plot(MMO(1),MMO(2),'k')
plot(-m/s1, sb*m/s1,'g')
yMOMu=VMOM(2,1).*(xO-MOM(1))./VMOM(1,1)+MOM(2);
yMOMs=VMOM(2,2).*(xO-MOM(1))./VMOM(1,2)+MOM(2);
plot(xO,yMOMu,'k--',xO,yMOMs,'-','markersize',0.5)
yOMMu=VOMM(2,1).*(xO-OMM(1))./VOMM(1,1)+OMM(2);
yOMMs=VOMM(2,2).*(xO-OMM(1))./VOMM(1,2)+OMM(2);
plot(xO,yOMMu,'k--',xO,yOMMs,'-','markersize',0.5)
yMMOu=VMMO(2,1).*(xO-MMO(1))./VMMO(1,1)+MMO(2);
yMMOs=VMMO(2,2).*(xO-MMO(1))./VMMO(1,2)+MMO(2);
plot(xO,yMMOu,'k--',xO,yMMOs,'-','markersize',0.5)

box,xlabel('x'),ylabel('y'),title('s^b=0.8,s^1=-3.1,s^2=3,m=1')
