# Supplementary material for: On the Price Dynamics of a Two-Dimensional Financial Market Model with Entry Levels
Source: Hindawi journal article supplement (doi:10.1155/2020/3654083), 2020-08-07
Supplement: f1 [file 3654083.f1.zip › 3654083.f1/the supplementary information files/finac-mark.lua]

--%  ft| BIFURCATION_2 sn| x:~3~~y:~0.2~~s2:~-0.6~~m:~0.5~~Hori:~sb~~min:~0~~max:~1~~Vert:~s1~~ n| #0 d| 3 n| #1 d| 0.2 n| #2 d| -0.6 n| #3 d| 0.5 n| #4 d| sb n| #5 d| 0 n| #6 d| 1 n| #7 d| s1 n| #8 d| -5 n| #9 d| 1 n| #10 d| 0.1 n| #11 d| 10000 n| #12 d| 20 n| #13 d| 10000 
--%  ft| BIFURCATION_2 sn| x:~-0.6~~y:~0.2~~s2:~3~~m:~1~~Hori:~sb~~min:~0~~max:~1~~Vert:~s1~~ n| #0 d| -0.6 n| #1 d| 0.2 n| #2 d| 3 n| #3 d| 1 n| #4 d| sb n| #5 d| 0 n| #6 d| 1 n| #7 d| s1 n| #8 d| -6 n| #9 d| 1 n| #10 d| 0.1 n| #11 d| 10000 n| #12 d| 20 n| #13 d| 1000 
--%  ft| BIFURCATION_2 sn| x:~0.6~~y:~-0.6~~sb:~0.8~~s1:~-0.6~~Hori:~s2~~min:~-5~~max:~5~~Vert:~m~~ n| #0 d| 0.6 n| #1 d| -0.6 n| #2 d| 0.8 n| #3 d| -0.6 n| #4 d| s2 n| #5 d| -5 n| #6 d| 5 n| #7 d| m n| #8 d| 0 n| #9 d| 3 n| #10 d| 0.1 n| #11 d| 10000 n| #12 d| 20 n| #13 d| 1000 
--%  ft| BIFURCATION_2 sn| x:~0.99~~y:~-0.8~~sb:~0.8~~s1:~-0.6~~Hori:~s2~~min:~-5~~max:~5~~Vert:~m~~ n| #0 d| 0.99 n| #1 d| -0.8 n| #2 d| 0.8 n| #3 d| -0.6 n| #4 d| s2 n| #5 d| -5 n| #6 d| 5 n| #7 d| m n| #8 d| 0 n| #9 d| 3 n| #10 d| 0.1 n| #11 d| 10000 n| #12 d| 20 n| #13 d| 1000 
--%  ft| BASIN_B0 sn| sb:~0.8~~s1:~-3.2~~s2:~3~~m:~1~~infi:~10000~~tran:~100~~iter:~500~~tria:~1~~ n| #0 d| 0.8 n| #1 d| -3.2 n| #2 d| 3 n| #3 d| 1 n| #4 d| 10000 n| #5 d| 100 n| #6 d| 500 n| #7 d| 1 n| #8 d| -3 n| #9 d| 3 n| #10 d| -9 n| #11 d| 3 
--%  ft| BIFURCATION_2 sn| x:~0.5~~y:~-0.5~~s2:~-3~~m:~1~~Hori:~sb~~min:~0~~max:~1~~Vert:~s1~~ n| #0 d| 0.5 n| #1 d| -0.5 n| #2 d| -3 n| #3 d| 1 n| #4 d| sb n| #5 d| 0 n| #6 d| 1 n| #7 d| s1 n| #8 d| -3 n| #9 d| 3.5 n| #10 d| 0.1 n| #11 d| 10000 n| #12 d| 20 n| #13 d| 1000 
--%  ft| BASIN_B0 sn| sb:~0.8~~s1:~-3.5~~s2:~3~~m:~1~~infi:~10000~~tran:~100~~iter:~500~~tria:~1~~ n| #0 d| 0.8 n| #1 d| -3.5 n| #2 d| 3 n| #3 d| 1 n| #4 d| 10000 n| #5 d| 100 n| #6 d| 500 n| #7 d| 1 n| #8 d| -3 n| #9 d| 3 n| #10 d| -9 n| #11 d| 3 
--%  ft| BASIN_B0 sn| sb:~0.8~~s1:~-3.1~~s2:~3~~m:~1~~infi:~10000~~tran:~200~~iter:~500~~tria:~1~~ n| #0 d| 0.8 n| #1 d| -3.1 n| #2 d| 3 n| #3 d| 1 n| #4 d| 10000 n| #5 d| 200 n| #6 d| 500 n| #7 d| 1 n| #8 d| -5 n| #9 d| 15 n| #10 d| -15 n| #11 d| 5 
--%  ft| BIFURCATION_2 sn| x:~0.5~~y:~-0.5~~s2:~-3~~m:~4~~Hori:~sb~~min:~0~~max:~1~~Vert:~s1~~ n| #0 d| 0.5 n| #1 d| -0.5 n| #2 d| -3 n| #3 d| 4 n| #4 d| sb n| #5 d| 0 n| #6 d| 1 n| #7 d| s1 n| #8 d| -3 n| #9 d| 3.5 n| #10 d| 0.1 n| #11 d| 10000 n| #12 d| 20 n| #13 d| 1000 
--%  ft| BIFURCATION_2 sn| x:~0.5~~y:~-0.5~~s2:~-3~~m:~1.8~~Hori:~sb~~min:~0~~max:~1~~Vert:~s1~~ n| #0 d| 0.5 n| #1 d| -0.5 n| #2 d| -3 n| #3 d| 1.8 n| #4 d| sb n| #5 d| 0 n| #6 d| 1 n| #7 d| s1 n| #8 d| -3 n| #9 d| 3.5 n| #10 d| 0.1 n| #11 d| 10000 n| #12 d| 20 n| #13 d| 200 
--%  ft| BIFURCATION_2 sn| x:~-0.6~~y:~0.2~~s2:~1~~m:~3~~Hori:~sb~~min:~0~~max:~1~~Vert:~s1~~ n| #0 d| -0.6 n| #1 d| 0.2 n| #2 d| 1 n| #3 d| 3 n| #4 d| sb n| #5 d| 0 n| #6 d| 1 n| #7 d| s1 n| #8 d| -6 n| #9 d| 1 n| #10 d| 0.1 n| #11 d| 10000 n| #12 d| 20 n| #13 d| 1000 
--%  ft| BASIN_B0 sn| sb:~0.8~~s1:~-3.25~~s2:~-0.6~~m:~0.5~~infi:~10000~~tran:~200~~iter:~2000~~tria:~1~~ n| #0 d| 0.8 n| #1 d| -3.25 n| #2 d| -0.6 n| #3 d| 0.5 n| #4 d| 10000 n| #5 d| 200 n| #6 d| 2000 n| #7 d| 1 n| #8 d| -9 n| #9 d| 9 n| #10 d| -9 n| #11 d| 9 
--%  ft| BASIN_B0 sn| sb:~0.8~~s1:~-2~~s2:~-3~~m:~1~~infi:~10000~~tran:~200~~iter:~2000~~tria:~1~~ n| #0 d| 0.8 n| #1 d| -2 n| #2 d| -3 n| #3 d| 1 n| #4 d| 10000 n| #5 d| 200 n| #6 d| 2000 n| #7 d| 1 n| #8 d| -9 n| #9 d| 9 n| #10 d| -9 n| #11 d| 9 
--%  ft| BASIN_B0 sn| sb:~0.8~~s1:~-2.5~~s2:~-3~~m:~1~~infi:~10000~~tran:~200~~iter:~1000~~tria:~1~~ n| #0 d| 0.8 n| #1 d| -2.5 n| #2 d| -3 n| #3 d| 1 n| #4 d| 10000 n| #5 d| 200 n| #6 d| 1000 n| #7 d| 1 n| #8 d| -3 n| #9 d| 3 n| #10 d| -3 n| #11 d| 8 
--%  ft| BASIN_B0 sn| sb:~0.8~~s1:~-3~~s2:~-3~~m:~1~~infi:~10000~~tran:~200~~iter:~1000~~tria:~1~~ n| #0 d| 0.8 n| #1 d| -3 n| #2 d| -3 n| #3 d| 1 n| #4 d| 10000 n| #5 d| 200 n| #6 d| 1000 n| #7 d| 1 n| #8 d| -3 n| #9 d| 3 n| #10 d| -3 n| #11 d| 8 
--%  ft| BASIN_B0 sn| sb:~0.8~~s1:~-4.75~~s2:~3~~m:~1~~infi:~10000~~tran:~500~~iter:~1000~~tria:~1~~ n| #0 d| 0.8 n| #1 d| -4.75 n| #2 d| 3 n| #3 d| 1 n| #4 d| 10000 n| #5 d| 500 n| #6 d| 1000 n| #7 d| 1 n| #8 d| -9 n| #9 d| 9 n| #10 d| -9 n| #11 d| 9 
--%  ft| LYAPUNOV_VP sn| x:~0.3~~y:~-0.2~~s1:~-4.75~~s2:~3~~m:~1~~Hori:~sb~~min:~0~~max:~1~~ n| #0 d| 0.3 n| #1 d| -0.2 n| #2 d| -4.75 n| #3 d| 3 n| #4 d| 1 n| #5 d| sb n| #6 d| 0 n| #7 d| 1 n| #8 d| -2 n| #9 d| 1 n| #10 d| 1000 
--%  ft| BASIN_B0 sn| sb:~0.9~~s1:~1~~s2:~-3~~m:~1~~infi:~10000~~tran:~1000~~iter:~4000~~tria:~1~~ n| #0 d| 0.9 n| #1 d| 1 n| #2 d| -3 n| #3 d| 1 n| #4 d| 10000 n| #5 d| 1000 n| #6 d| 4000 n| #7 d| 1 n| #8 d| -9 n| #9 d| 9 n| #10 d| -9 n| #11 d| 9 
--%  ft| LYAPUNOV_VP sn| x:~0.5~~y:~-0.3~~s1:~1~~s2:~-3~~m:~1~~Hori:~sb~~min:~0~~max:~1~~ n| #0 d| 0.5 n| #1 d| -0.3 n| #2 d| 1 n| #3 d| -3 n| #4 d| 1 n| #5 d| sb n| #6 d| 0 n| #7 d| 1 n| #8 d| -2 n| #9 d| 1 n| #10 d| 1000 
--%  ft| BASIN_B0 sn| sb:~0.98~~s1:~1~~s2:~-3~~m:~1~~infi:~10000~~tran:~1000~~iter:~6000~~tria:~1~~ n| #0 d| 0.98 n| #1 d| 1 n| #2 d| -3 n| #3 d| 1 n| #4 d| 10000 n| #5 d| 1000 n| #6 d| 6000 n| #7 d| 1 n| #8 d| -15 n| #9 d| 15 n| #10 d| -15 n| #11 d| 15 
--%  ft| LYAPUNOV_VP sn| x:~0.3~~y:~-0.2~~s1:~-4~~s2:~3~~m:~1~~Hori:~sb~~min:~0~~max:~1~~ n| #0 d| 0.3 n| #1 d| -0.2 n| #2 d| -4 n| #3 d| 3 n| #4 d| 1 n| #5 d| sb n| #6 d| 0 n| #7 d| 1 n| #8 d| -2 n| #9 d| 1 n| #10 d| 1000 
--%  ft| LYAPUNOV_VP sn| x:~0.3~~y:~2~~s1:~-4.5~~s2:~3~~m:~1~~Hori:~sb~~min:~0~~max:~1~~ n| #0 d| 0.3 n| #1 d| 2 n| #2 d| -4.5 n| #3 d| 3 n| #4 d| 1 n| #5 d| sb n| #6 d| 0 n| #7 d| 1 n| #8 d| -2 n| #9 d| 1 n| #10 d| 1000 
--%  ft| BASIN_B0 sn| sb:~0.8~~s1:~-4.5~~s2:~3~~m:~1~~infi:~10000~~tran:~500~~iter:~10000~~tria:~1~~ n| #0 d| 0.8 n| #1 d| -4.5 n| #2 d| 3 n| #3 d| 1 n| #4 d| 10000 n| #5 d| 500 n| #6 d| 10000 n| #7 d| 1 n| #8 d| -9 n| #9 d| 9 n| #10 d| -9 n| #11 d| 9 
--%  ft| BASIN_B0 sn| sb:~0.8~~s1:~1~~s2:~-3~~m:~1~~infi:~10000~~tran:~1000~~iter:~4000~~tria:~1~~ n| #0 d| 0.8 n| #1 d| 1 n| #2 d| -3 n| #3 d| 1 n| #4 d| 10000 n| #5 d| 1000 n| #6 d| 4000 n| #7 d| 1 n| #8 d| -9 n| #9 d| 9 n| #10 d| -9 n| #11 d| 9 
--%  ft| BIFURCATION_1 sn| x:~0.3~~y:~2~~s1:~-4.5~~s2:~3~~m:~1~~Hori:~sb~~min:~0~~max:~1~~ n| #0 d| 0.3 n| #1 d| 2 n| #2 d| -4.5 n| #3 d| 3 n| #4 d| 1 n| #5 d| sb n| #6 d| 0 n| #7 d| 1 n| #8 d| -8 n| #9 d| 8 n| #10 d| 1000 n| #11 d| 1000 n| #12 d| x 
--%  ft| LYAPUNOV_VP sn| x:~0.5~~y:~-0.3~~s1:~-0.5~~s2:~-3~~m:~1~~Hori:~sb~~min:~0.78~~max:~1~~ n| #0 d| 0.5 n| #1 d| -0.3 n| #2 d| -0.5 n| #3 d| -3 n| #4 d| 1 n| #5 d| sb n| #6 d| 0.78 n| #7 d| 1 n| #8 d| -0.2 n| #9 d| 0.2 n| #10 d| 1000 
--%  ft| BASIN_B0 sn| sb:~0.95~~s1:~-0.5~~s2:~-3~~m:~1~~infi:~10000~~tran:~1000~~iter:~10000~~tria:~1~~ n| #0 d| 0.95 n| #1 d| -0.5 n| #2 d| -3 n| #3 d| 1 n| #4 d| 10000 n| #5 d| 1000 n| #6 d| 10000 n| #7 d| 1 n| #8 d| -9 n| #9 d| 9 n| #10 d| -9 n| #11 d| 9 
--%  ft| BIFURCATION_1 sn| x:~0.5~~y:~-0.3~~s1:~1~~s2:~-3~~m:~1.5~~Hori:~sb~~min:~0~~max:~1~~ n| #0 d| 0.5 n| #1 d| -0.3 n| #2 d| 1 n| #3 d| -3 n| #4 d| 1.5 n| #5 d| sb n| #6 d| 0 n| #7 d| 1 n| #8 d| -8 n| #9 d| 8 n| #10 d| 1000 n| #11 d| 1000 n| #12 d| x 
--%  ft| LYAPUNOV_VP sn| x:~0.5~~y:~-0.3~~s1:~1~~s2:~-3~~m:~1.5~~Hori:~sb~~min:~0~~max:~1~~ n| #0 d| 0.5 n| #1 d| -0.3 n| #2 d| 1 n| #3 d| -3 n| #4 d| 1.5 n| #5 d| sb n| #6 d| 0 n| #7 d| 1 n| #8 d| -1 n| #9 d| 0.5 n| #10 d| 1000 
--%  ft| BASIN_B0 sn| sb:~0.9~~s1:~1~~s2:~-3~~m:~1.5~~infi:~10000~~tran:~1000~~iter:~10000~~tria:~1~~ n| #0 d| 0.9 n| #1 d| 1 n| #2 d| -3 n| #3 d| 1.5 n| #4 d| 10000 n| #5 d| 1000 n| #6 d| 10000 n| #7 d| 1 n| #8 d| -9 n| #9 d| 9 n| #10 d| -9 n| #11 d| 9 
--%  ft| BIFURCATION_1 sn| x:~0.5~~y:~-0.3~~s1:~-0.5~~s2:~-3~~m:~1~~Hori:~sb~~min:~0.78~~max:~1~~ n| #0 d| 0.5 n| #1 d| -0.3 n| #2 d| -0.5 n| #3 d| -3 n| #4 d| 1 n| #5 d| sb n| #6 d| 0.78 n| #7 d| 1 n| #8 d| -8 n| #9 d| 8 n| #10 d| 1000 n| #11 d| 5000 n| #12 d| x 
--@@
name = "financal model "
description = "See Model refs in user's guide"
type = "D"
parameters = {"sb","s1","s2","m"}
variables = {"x","y"}

function f(sb,s1,s2,m,x,y)
	if math.abs(x)>1 then
u=(1+sb+s1+s2)*x+y+m
v=-sb*x
    end

    if math.abs(x)<1 then
u=(1+sb+s1)*x+y+m
v=-sb*x
	end

	return u,v
	end
