# Supplementary material for: On the Price Dynamics of a Two-Dimensional Financial Market Model with Entry Levels
Source: Hindawi journal article supplement (doi:10.1155/2020/3654083), 2020-08-07
Supplement: f1 [file 3654083.f1.zip › 3654083.f1/the supplementary information files/fm2lss.lua]

--%  ft| BIFURCATION_1 sn| x:~3~~y:~0.5~~sb:~0.8~~s3:~0.6~~m1:~0~~m2:~0~~Hori:~s1~~min:~-4.25~~ n| #0 d| 3 n| #1 d| 0.5 n| #2 d| 0.8 n| #3 d| 0.6 n| #4 d| 0 n| #5 d| 0 n| #6 d| s1 n| #7 d| -4.25 n| #8 d| -3.5 n| #9 d| -4 n| #10 d| 4 n| #11 d| 1000 n| #12 d| 500 n| #13 d| x 
--%  ft| BIFURCATION_1 sn| x:~3~~y:~0.5~~sb:~0.8~~s3:~0.6~~m1:~0~~m2:~0~~Hori:~s1~~min:~-4.5~~ n| #0 d| 3 n| #1 d| 0.5 n| #2 d| 0.8 n| #3 d| 0.6 n| #4 d| 0 n| #5 d| 0 n| #6 d| s1 n| #7 d| -4.5 n| #8 d| 1 n| #9 d| -4 n| #10 d| 4 n| #11 d| 1000 n| #12 d| 500 n| #13 d| x 
--%  ft| BASIN_B0 sn| sb:~0.8~~s1:~-4~~s3:~0.6~~m1:~0~~m2:~0~~infi:~10000~~tran:~1000~~iter:~500~~ n| #0 d| 0.8 n| #1 d| -4 n| #2 d| 0.6 n| #3 d| 0 n| #4 d| 0 n| #5 d| 10000 n| #6 d| 1000 n| #7 d| 500 n| #8 d| 1 n| #9 d| -5 n| #10 d| 5 n| #11 d| -5 n| #12 d| 5 
--%  ft| BIFURCATION_2 sn| x:~-3~~y:~0.2~~s3:~0.6~~m1:~0~~m2:~0~~Hori:~sb~~min:~0~~max:~1~~ n| #0 d| -3 n| #1 d| 0.2 n| #2 d| 0.6 n| #3 d| 0 n| #4 d| 0 n| #5 d| sb n| #6 d| 0 n| #7 d| 1 n| #8 d| s1 n| #9 d| -5 n| #10 d| 1 n| #11 d| 0.1 n| #12 d| 10000 n| #13 d| 20 n| #14 d| 1000 
--%  ft| BIFURCATION_2 sn| x:~03~~y:~0.2~~s3:~0.6~~m1:~0~~m2:~0~~Hori:~sb~~min:~0~~max:~1~~ n| #0 d| 03 n| #1 d| 0.2 n| #2 d| 0.6 n| #3 d| 0 n| #4 d| 0 n| #5 d| sb n| #6 d| 0 n| #7 d| 1 n| #8 d| s1 n| #9 d| -5 n| #10 d| 1 n| #11 d| 0.1 n| #12 d| 10000 n| #13 d| 20 n| #14 d| 1000 
--%  ft| BASIN_B0 sn| sb:~0.8~~s1:~-0.1~~s3:~0.6~~m1:~0~~m2:~0~~infi:~10000~~tran:~2000~~iter:~500~~ n| #0 d| 0.8 n| #1 d| -0.1 n| #2 d| 0.6 n| #3 d| 0 n| #4 d| 0 n| #5 d| 10000 n| #6 d| 2000 n| #7 d| 500 n| #8 d| 1 n| #9 d| -3 n| #10 d| 3 n| #11 d| -4 n| #12 d| 4 
--%  ft| BASIN_B0 sn| sb:~0.8~~s1:~-0.05~~s3:~0.6~~m1:~0~~m2:~0~~infi:~10000~~tran:~2000~~iter:~500~~ n| #0 d| 0.8 n| #1 d| -0.05 n| #2 d| 0.6 n| #3 d| 0 n| #4 d| 0 n| #5 d| 10000 n| #6 d| 2000 n| #7 d| 500 n| #8 d| 1 n| #9 d| -3 n| #10 d| 3 n| #11 d| -4 n| #12 d| 4 
--%  ft| BASIN_B0 sn| sb:~0.8~~s1:~-0.5~~s3:~0.6~~m1:~0~~m2:~0~~infi:~10000~~tran:~2000~~iter:~500~~ n| #0 d| 0.8 n| #1 d| -0.5 n| #2 d| 0.6 n| #3 d| 0 n| #4 d| 0 n| #5 d| 10000 n| #6 d| 2000 n| #7 d| 500 n| #8 d| 1 n| #9 d| -3 n| #10 d| 3 n| #11 d| -4 n| #12 d| 4 
--%  ft| BIFURCATION_2 sn| x:~0.3~~y:~0.2~~s3:~0.6~~m1:~0~~m2:~0~~Hori:~sb~~min:~0~~max:~1~~ n| #0 d| 0.3 n| #1 d| 0.2 n| #2 d| 0.6 n| #3 d| 0 n| #4 d| 0 n| #5 d| sb n| #6 d| 0 n| #7 d| 1 n| #8 d| s1 n| #9 d| -5 n| #10 d| 1 n| #11 d| 0.1 n| #12 d| 10000 n| #13 d| 20 n| #14 d| 1000 
--%  ft| BASIN_B0 sn| sb:~0.8~~s1:~-0.6~~s3:~0.6~~m1:~0~~m2:~0~~infi:~10000~~tran:~2000~~iter:~500~~ n| #0 d| 0.8 n| #1 d| -0.6 n| #2 d| 0.6 n| #3 d| 0 n| #4 d| 0 n| #5 d| 10000 n| #6 d| 2000 n| #7 d| 500 n| #8 d| 1 n| #9 d| -3 n| #10 d| 3 n| #11 d| -4 n| #12 d| 4 
--%  ft| BASIN_B0 sn| sb:~0.8~~s1:~-3.7~~s3:~0.6~~m1:~0~~m2:~0~~infi:~10000~~tran:~2000~~iter:~1000~~ n| #0 d| 0.8 n| #1 d| -3.7 n| #2 d| 0.6 n| #3 d| 0 n| #4 d| 0 n| #5 d| 10000 n| #6 d| 2000 n| #7 d| 1000 n| #8 d| 1 n| #9 d| -2 n| #10 d| 2 n| #11 d| -2 n| #12 d| 2 
--%  ft| BASIN_B0 sn| sb:~0.8~~s1:~-0.65~~s3:~0.6~~m1:~0~~m2:~0~~infi:~10000~~tran:~2000~~iter:~1000~~ n| #0 d| 0.8 n| #1 d| -0.65 n| #2 d| 0.6 n| #3 d| 0 n| #4 d| 0 n| #5 d| 10000 n| #6 d| 2000 n| #7 d| 1000 n| #8 d| 1 n| #9 d| -2 n| #10 d| 2 n| #11 d| -2 n| #12 d| 2 
--%  ft| BASIN_B0 sn| sb:~0.8~~s1:~-4.018~~s3:~0.6~~m1:~0~~m2:~0~~infi:~10000~~tran:~2000~~iter:~1000~~ n| #0 d| 0.8 n| #1 d| -4.018 n| #2 d| 0.6 n| #3 d| 0 n| #4 d| 0 n| #5 d| 10000 n| #6 d| 2000 n| #7 d| 1000 n| #8 d| 1 n| #9 d| -2 n| #10 d| 2 n| #11 d| -2 n| #12 d| 2 
--%  ft| BASIN_B0 sn| sb:~0.8~~s1:~-4.18~~s3:~0.6~~m1:~0~~m2:~0~~infi:~10000~~tran:~2000~~iter:~1000~~ n| #0 d| 0.8 n| #1 d| -4.18 n| #2 d| 0.6 n| #3 d| 0 n| #4 d| 0 n| #5 d| 10000 n| #6 d| 2000 n| #7 d| 1000 n| #8 d| 1 n| #9 d| -4 n| #10 d| 4 n| #11 d| -4 n| #12 d| 4 
--%  ft| BIFURCATION_2 sn| x:~0.3~~y:~0.2~~s3:~2~~m1:~0~~m2:~0~~Hori:~sb~~min:~0~~max:~1~~ n| #0 d| 0.3 n| #1 d| 0.2 n| #2 d| 2 n| #3 d| 0 n| #4 d| 0 n| #5 d| sb n| #6 d| 0 n| #7 d| 1 n| #8 d| s1 n| #9 d| -5 n| #10 d| 1 n| #11 d| 0.1 n| #12 d| 10000 n| #13 d| 20 n| #14 d| 1000 
--%  ft| BIFURCATION_1 sn| x:~0.3~~y:~0.5~~sb:~0.8~~s3:~2~~m1:~0~~m2:~0~~Hori:~s1~~min:~-5.7~~ n| #0 d| 0.3 n| #1 d| 0.5 n| #2 d| 0.8 n| #3 d| 2 n| #4 d| 0 n| #5 d| 0 n| #6 d| s1 n| #7 d| -5.7 n| #8 d| -3.5 n| #9 d| -9 n| #10 d| 9 n| #11 d| 1000 n| #12 d| 1000 n| #13 d| x 
--%  ft| BIFURCATION_2 sn| x:~0.3~~y:~0.2~~sb:~0.8~~m1:~0~~m2:~0~~Hori:~s1~~min:~-5~~max:~5~~ n| #0 d| 0.3 n| #1 d| 0.2 n| #2 d| 0.8 n| #3 d| 0 n| #4 d| 0 n| #5 d| s1 n| #6 d| -5 n| #7 d| 5 n| #8 d| s3 n| #9 d| -5 n| #10 d| 5 n| #11 d| 0.1 n| #12 d| 10000 n| #13 d| 20 n| #14 d| 1000 
--%  ft| TRAJECTORY_T1_V0_A1_O0 sn| x:~3~~y:~0.2~~sb:~0.8~~s1:~-3.9~~s3:~0.6~~m1:~0~~m2:~0~~tran:~1000~~ n| #0 d| 3 n| #1 d| 0.2 n| #2 d| 0.8 n| #3 d| -3.9 n| #4 d| 0.6 n| #5 d| 0 n| #6 d| 0 n| #7 d| 1000 n| #8 d| 200 n| #9 d| 1000 n| #10 d| x 
--%  ft| TRAJECTORY_T1_V0_A1_O0 sn| x:~3~~y:~0.2~~sb:~0.8~~s1:~-3.7~~s3:~0.6~~m1:~0~~m2:~0~~tran:~1000~~ n| #0 d| 3 n| #1 d| 0.2 n| #2 d| 0.8 n| #3 d| -3.7 n| #4 d| 0.6 n| #5 d| 0 n| #6 d| 0 n| #7 d| 1000 n| #8 d| 200 n| #9 d| 1000 n| #10 d| x 
--%  ft| TRAJECTORY_T1_V0_A1_O0 sn| x:~3~~y:~0.2~~sb:~0.8~~s1:~-4.18~~s3:~0.6~~m1:~0~~m2:~0~~tran:~1000~~ n| #0 d| 3 n| #1 d| 0.2 n| #2 d| 0.8 n| #3 d| -4.18 n| #4 d| 0.6 n| #5 d| 0 n| #6 d| 0 n| #7 d| 1000 n| #8 d| 200 n| #9 d| 1000 n| #10 d| x 
--%  ft| BIFURCATION_2 sn| x:~0.3~~y:~0.2~~s3:~2~~m1:~0~~m2:~0~~Hori:~s1~~min:~-5~~max:~-1~~ n| #0 d| 0.3 n| #1 d| 0.2 n| #2 d| 2 n| #3 d| 0 n| #4 d| 0 n| #5 d| s1 n| #6 d| -5 n| #7 d| -1 n| #8 d| sb n| #9 d| 0 n| #10 d| 1 n| #11 d| 0.1 n| #12 d| 10000 n| #13 d| 20 n| #14 d| 1000 
--%  ft| BIFURCATION_2 sn| x:~0.3~~y:~0.2~~s3:~-0.6~~m1:~0~~m2:~0~~Hori:~sb~~min:~0~~max:~1~~ n| #0 d| 0.3 n| #1 d| 0.2 n| #2 d| -0.6 n| #3 d| 0 n| #4 d| 0 n| #5 d| sb n| #6 d| 0 n| #7 d| 1 n| #8 d| s1 n| #9 d| -5 n| #10 d| 1 n| #11 d| 0.1 n| #12 d| 10000 n| #13 d| 20 n| #14 d| 1000 
--%  ft| LYAPUNOV_VP sn| x:~0.3~~y:~0.2~~sb:~0.8~~s3:~0.6~~m1:~0~~m2:~0~~Hori:~s1~~min:~-4.2~~ n| #0 d| 0.3 n| #1 d| 0.2 n| #2 d| 0.8 n| #3 d| 0.6 n| #4 d| 0 n| #5 d| 0 n| #6 d| s1 n| #7 d| -4.2 n| #8 d| -3 n| #9 d| -0.3 n| #10 d| 0.01 n| #11 d| 100 
--@@
name = "financal model "
description = "See Model refs in user's guide"
type = "D"
parameters = {"sb","s1","s3","m1","m2"}
variables = {"x","y"}

function f(sb,s1,s3,m1, m2,x,y)
	if math.abs(x)>1 then
u=(1+sb+s1+s3)*x+y+m1
v=-sb*x
    end

    if math.abs(x)<1 then
u=(1+sb+s1)*x+y+m2
v=-sb*x
	end

	return u,v
	end
