# Supplementary material for: On the Price Dynamics of a Two-Dimensional Financial Market Model with Entry Levels
Source: Hindawi journal article supplement (doi:10.1155/2020/3654083), 2020-08-07
Supplement: f1 [file 3654083.f1.zip › 3654083.f1/the supplementary information files/manifold.m]

%manifold
clear

axis([-3,3,-3,3]);
%axis square;
sb=0.8;
s1=0.5;
s2=-0.6;
hold on
z=-15:0.001:15;
w=1;;%border
w1=-1;;%border
s=sb;
t=-sb;
plot(w,z,'b');%draw the border 
plot(w1,z,'r');%draw the border 
plot(z,s);%draw the border 
plot(z,t);

AM=[1+sb+s1 1;-sb 0];
AO=[1+sb+s1+s2 1;-sb 0];

[VM,DM] = eig(AM);
[VO,DO] = eig(AO);

x=-1:0.01:1;
ys=(-sb/DM(2,2))*x;
yu=(-sb/DM(1,1))*x;
plot(x,ys,'-b');
plot(x,yu,'-r')
zl=-5:0.01:-1;
ys1=-(sb/DM(2,2)+s2)*zl;
plot(zl,ys1,'-m');
zr=1:0.01:5;
ys1=-(sb/DM(2,2)+s2)*zr;
plot(zr,ys1,'-m');
box,xlabel('x'),ylabel('y'),title('s^b=0.8,s^1=0.5,s^2=-0.6')
