# Supplementary material for: On the Price Dynamics of a Two-Dimensional Financial Market Model with Entry Levels
Source: Hindawi journal article supplement (doi:10.1155/2020/3654083), 2020-08-07
Supplement: f1 [file 3654083.f1.zip › 3654083.f1/the supplementary information files/manifold1.m]

axis([-5,5,-5,5]);
%axis([-10,10,-10,10]);
%axis([-16,3,-3,3]);
axis square;
sb=0.8;
s1=-4.5;
s2=3;
m=1;
hold on
z=-20:0.001:15;
w=1;;% the border 
w1=-1;;%the border 
s=sb;
t=-sb;
plot(w,z,'b');%draw the border 
plot(w1,z,'r');%draw the border 
plot(z,s);%draw the border 
plot(z,t);

AM=[1+sb+s1 1;-sb 0];
AO=[1+sb+s1+s2 1;-sb 0]; 
e1=[1,0]';
[VM,DM] = eig(AM)
[VO,DO] = eig(AO)
[VOM,DOM] = eig(AO*AM)
[VMO,DMO] = eig(AM*AO)

%[VMOM,DMOM] = eig(AM*AO*AM)
%[VOMM,DOMM] = eig(AM*AM*AO)
%[VMMO,DMMO] = eig(AO*AM*AM)
%[VOMO,DOMO] = eig(AO*AM*AO)

[-m/s1 sb*m/s1]
[-m/(s1+s2) sb*m/(s1+s2)] 
MO=inv(eye(size(AM))-AO*AM)*m*(AO+eye(size(AM)))*e1%33 periodic point MOM
OM=AM*MO+m*e1%3 periodic point OMM
MO=AO*OM+m*e1
plot(-m/s1,sb*m/s1,'ro')
plot(-m/(s1+s2),sb*m/(s1+s2),'r*')
%draw stable and unstable manifolds of M
x=-70:0.01:70;
ysm=-sb.*(x+m/s1)./DM(2,2)+ sb*m/s1;
yum=-sb.*(x+m/s1)./DM(1,1)+ sb*m/s1;
plot(x,yum,'k--',x,ysm,'-','markersize',0.5)
x1=1:0.01:20;
ysmo=(DM(2,2)-(1+sb+s1+s2)).*x1+(DM(2,2)-1)*m/s1-m;
plot(x1,ysmo,'m-')
x2=-20:0.01:-1;
ysmo=(DM(2,2)-(1+sb+s1+s2)).*x2+(DM(2,2)-1)*m/s1-m;;
plot(x2,ysmo,'m-')
x3=-1:0.01:1;
ysmm=(DM(2,2)-(1+sb+s1)).*x3+(DM(2,2)-1)*m/s1-m;
plot(x3,ysmm,'m-') 
y1=sb:0.01:20;
xumo=(1/DM(1,1)-(1+sb+s1+s2)/sb).*y1+(1-1/DM(1,1))*sb*m/s1+m;
plot(xumo,y1,'m--')
y2=-20:0.01:-sb;
xumo=(1/DM(1,1)-(1+sb+s1+s2)/sb).*y2+(1-1/DM(1,1))*sb*m/s1+m;
plot(xumo,y2,'m--')
y3=-sb:0.01:sb;
xumm=(1/DM(1,1)-(1+sb+s1)/sb).*y3+(1-1/DM(1,1))*sb*m/s1+m;
plot(xumm,y3,'m--')
y4=-sb*((1/DM(1,1)-(1+sb+s1+s2)/sb)*sb+(1-1/DM(1,1))*sb*m/s1+m):0.01:sb;
xumom=((1+sb+s1+s2)-sb/DM(1,1)-(1+sb+s1)/sb).*y4+((1-1/DM(1,1))*sb*m/s1+m)*sb*DM(1,1)/((1+sb+s1+s2)*DM(1,1)-sb)+m;
plot(xumom,y4,'b-')
y5=-20:0.01:(-(1/DM(1,1)-(1+sb+s1+s2)/sb)*sb+(1-1/DM(1,1))*sb*m/s1+m)*(-sb);
xumoo=((1+sb+s1+s2)-sb/DM(1,1)-(1+sb+s1+s2)/sb).*y5+((1-1/DM(1,1))*sb*m/s1+m)*sb*DM(1,1)/((1+sb+s1+s2)*DM(1,1)-sb)+m;
plot(xumoo,y5,'b-')
y6=sb:0.01:20;
xumoo=((1+sb+s1+s2)-sb/DM(1,1)-(1+sb+s1+s2)/sb).*y6+((1-1/DM(1,1))*sb*m/s1+m)*sb*DM(1,1)/((1+sb+s1+s2)*DM(1,1)-sb)+m;
plot(xumoo,y6,'b-')
%%draw stable and unstable manifolds of MO
%xO=-70:0.01:70;
%yOu=VO(2,1).*(xO+m/(s1+s2))./VO(1,1)+sb*m/(s1+s2);
%yOs=VO(2,2).*(xO+m/(s1+s2))./VO(1,2)+sb*m/(s1+s2);
%plot(xO,yOu,'k--',xO,yOs,'-','markersize',0.5)
%plot(MO(1),MO(2),'ro')
%plot(OM(1),OM(2),'r*')
%yMOu=VMO(2,1).*(xO-MO(1))./VMO(1,1)+MO(2);
%yMOs=VMO(2,2).*(xO-MO(1))./VMO(1,2)+MO(2);
%plot(xO,yMOu,'k--',xO,yMOs,'-','markersize',0.5)
%y1=sb:0.01:20;
%xOu2=-(1+sb+s1+s2)*y1./sb+VMO(2,2).*(-y1./sb-MO(1))./VMO(1,2)+MO(2)+m;
%plot(xOu2,y1,'m--')
%y2=-20:0.01:-sb;
%xOu2=-(1+sb+s1+s2)*y2./sb+VMO(2,2).*(-y2./sb-MO(1))./VMO(1,2)+MO(2)+m;
%plot(xOu2,y2,'m--')
%y3=-sb:0.01:sb;
%xMu2=-(1+sb+s1)*y3./sb+VMO(2,2).*(-y3./sb-MO(1))./VMO(1,2)+MO(2)+m;
%plot(xMu2,y3,'m--')
box,xlabel('x'),ylabel('y'),title('s^b=0.8,s^1=1,s^2=-3,m=1')
