# Supplementary material for: On the Price Dynamics of a Two-Dimensional Financial Market Model with Entry Levels
Source: Hindawi journal article supplement (doi:10.1155/2020/3654083), 2020-08-07
Supplement: f1 [file 3654083.f1.zip › 3654083.f1/the supplementary information files/manifold2.m]

axis([-5,9,-9,5]);
%axis([-10,4,-3,3]);
%axis([-16,3,-2,2]);
axis square;
sb=0.95;
s1=-0.5;
s2=-3;
m=1;
a=1+sb+s1;
hold on
z=-20:0.001:15;
w=1;;%border
w1=-1;;%border
s=sb;
t=-sb;
plot(w,z,'b');%draw the border 
plot(w1,z,'r');%draw the border 
plot(z,s);%draw the border 
plot(z,t);

AM=[1+sb+s1 1;-sb 0];
AO=[1+sb+s1+s2 1;-sb 0]; 
e1=[1,0]';
MO=inv(eye(size(AM))-AO*AM)*m*(AO+eye(size(AM)))*e1%2 periodic point MO
OM=AM*MO+m*e1%2 periodic point OM
MO=AO*OM+m*e1

%draw stable and unstable manifolds of M
[VM,DM] = eig(AM)
[VO,DO] = eig(AO)
[VMO,DMO] = eig(AO*AM)
[VOM,DOM] = eig(AM*AO)
%%draw stable and unstable manifolds of MO
M=[-m/s1,sb*m/s1]
O=[-m/(s1+s2),sb*m/(s1+s2)]
plot(-m/s1,sb*m/s1,'bo')
plot(-m/(s1+s2),sb*m/(s1+s2),'b*')
plot(MO(1),MO(2),'ro')
plot(OM(1),OM(2),'r*')
x1=1:0.01:20;
yMOs=(VMO(1,2)/VMO(2,2)-a-s2).*x1+MO(1)-VMO(1,2)*MO(2)/(VMO(2,2)*sb)-m;
plot(x1,yMOs,'m-')%1 order stable manifold of p1
x2=-20:0.01:-1;
yMOs=(VMO(1,2)/VMO(2,2)-a-s2).*x2+MO(1)-VMO(1,2)*MO(2)/(VMO(2,2)*sb)-m;
plot(x2,yMOs,'m-')
x3=-1:0.01:1;
yMMs=(VMO(1,2)/VMO(2,2)-a).*x3+MO(1)-VMO(1,2)*MO(2)/(VMO(2,2)*sb)-m;
plot(x3,yMMs,'m-')
x0=-70:0.01:70;
yMOu=VMO(2,1).*(x0-MO(1))./VMO(1,1)+MO(2);%unstable manifold of p1
yMOs=VMO(2,2).*(x0-MO(1))./VMO(1,2)+MO(2);%stable manifold of p1
plot(x0,yMOu,'k--',x0,yMOs,'-','markersize',0.5)
y1=sb:0.01:20;
xOu2=-(a+s2)*y1./sb+VMO(2,2).*(-y1./sb-MO(1))./VMO(1,2)+MO(2)+m;
plot(xOu2,y1,'m--')%1 order unstable manifold of p1
y2=-20:0.01:-sb;
xOu2=-(a+s2)*y2./sb+VMO(2,2).*(-y2./sb-MO(1))./VMO(1,2)+MO(2)+m;
plot(xOu2,y2,'m--')
y3=-sb:0.01:sb;
xMu2=-a*y3./sb+VMO(2,2).*(-y3./sb-MO(1))./VMO(1,2)+MO(2)+m;
plot(xMu2,y3,'m--')
box,xlabel('x'),ylabel('y'),title('s^b=0.95,s^1=-0.5,s^2=-3,m=1')
