# Supplementary material for: On the Price Dynamics of a Two-Dimensional Financial Market Model with Entry Levels
Source: Hindawi journal article supplement (doi:10.1155/2020/3654083), 2020-08-07
Supplement: f1 [file 3654083.f1.zip › 3654083.f1/the supplementary information files/period.m]

axis([-3,3,-5,5]);
%axis square;
sb=0.8;
s1=-0.5;
s3=0.6;
sig=1;%-1 or 1
hold on
z=-15:0.001:15;
w=1;;%==border
w1=-1;;%==border
s=sb;
t=-sb;
plot(w,z,'b');%Draw the border
plot(w1,z,'r');%Draw the border
plot(z,s);
plot(z,t);
u1=-1:0.0001:1;
u2=-5:0.0001:-1;
u3=1:0.0001:5;
a=1+sb+s1;
b=1+sb+s1+s3;
x1=sig-a*u1;
x2=sig-b*u2;
x3=sig-b*u3;
plot(u1,x1,'k');%draw the first order preimages of the border
plot(u2,x2,'m');%draw the first order preimages of the border
plot(u3,x3,'m');%draw the first order preimages of the border

AC=[1+sb+s1 1;-sb 0];
AS=[1+sb+s1+s3 1;-sb 0];

[VC,DC] = eig(AC)
[VS,DS] = eig(AS)

x=-5:0.01:5;
ys=(-sb/DS(2,2))*x;
yu=(-sb/DS(1,1))*x;
plot(x,ys,'--b');
plot(x,yu,'--r')

%[VCS,DCS] = eig(AC*AS)
%[VSC,DSC] = eig(AS*AC)

%[VSCS,DSCS] = eig(AS*AC*AS)
%[VCSC,DCSC] = eig(AC*AS*AC)
box,xlabel('x'),ylabel('y'),title('s^b=0.8,s^1=-0.5,s^2=0.6')
