# Supplementary material for: On the Price Dynamics of a Two-Dimensional Financial Market Model with Entry Levels
Source: Hindawi journal article supplement (doi:10.1155/2020/3654083), 2020-08-07
Supplement: f1 [file 3654083.f1.zip › 3654083.f1/the supplementary information files/preborder.m]

axis([-3,3,-5,5]);
%axis square;
sb=0.8;
s1=-0.1;
s3=0.6;
sig=-1;%-1 or 1
hold on
z=-15:0.001:15;
w=1;;%border
w1=-1;;%border
s=sb;
t=-sb;
plot(w,z,'b');%Draw the border
plot(w1,z,'r');%Draw the border
plot(z,s);
plot(z,t);
u1=-1:0.0001:1;
u2=-5:0.0001:-1;
u3=1:0.0001:5;
a=1+sb+s1;
b=1+sb+s1+s3;
x1=sig-a*u1;
x2=sig-b*u2;
x3=sig-b*u3;
plot(u1,x1,'k');%draw the first order preimages of the border
plot(u2,x2,'m');%draw the first order preimages of the border
plot(u3,x3,'m');%draw the first order preimages of the border


y1=sig/a+[sb/a-a]*u1;
y2=sig/a+[sb/a-b]*u2;
y3=sig/a+[sb/a-b]*u3;
plot(u1,y1,'r');%draw the second order preimages of the border
plot(u2,y2,'g');%draw the second  order preimages of the border
plot(u3,y3,'g');%draw the second  order preimages of the border

z1=sig/(a^2-sb)+[2*a*sb-a^3]/(a^2-sb)*u1;
z2=sig/(a^2-sb)+[(a+b)*sb-b*a^2]/(a^2-sb)*u2;
z3=sig/(a^2-sb)+[(a+b)*sb-b*a^2]/(a^2-sb)*u3;
plot(u1,z1,'b');%draw the third  order preimages of the border
plot(u2,z2,'c');%draw the third  order preimages of the border
plot(u3,z3,'c');%draw the third  order preimages of the border

v1=sig/(a^3-2*a*sb)-[a^4-3*a^2*sb+sb^2]/(a^3-2*a*sb)*u1;
v2=sig/(a^3-2*a*sb)-[b*a^3-2*a*b*sb-a^2*sb+sb^2]/(a^3-2*a*sb)*u2;
v3=sig/(a^3-2*a*sb)-[b*a^3-2*a*b*sb-a^2*sb+sb^2]/(a^3-2*a*sb)*u3;
plot(u1,v1,'k--');%draw the fourth order preimages of the border
plot(u2,v2,'m--');%draw the fourth order preimages of the border
plot(u3,v3,'m--');%draw the fourth order preimages of the border

box,xlabel('x'),ylabel('y'),title('s^b=0.8,s^1=-0.5,s^3=0.6')

hold off
