# Supplementary material for: On the Price Dynamics of a Two-Dimensional Financial Market Model with Entry Levels
Source: Hindawi journal article supplement (doi:10.1155/2020/3654083), 2020-08-07
Supplement: f1 [file 3654083.f1.zip › 3654083.f1/the supplementary information files/rigionfix.m]

axis([0 1,-3 3.5])
s2=-3;
sb=0:0.01:1;
m=0.5;
s11=-m;
s12=-s2;
s13=-2*sb-2;
s14=-2-2*sb-s2;
s15=-s2-m;

hold on

plot(sb,s11,'--k')
plot(sb,s12,'-b')
plot(sb,s13,'-r')
plot(sb,s14,'-r')
plot(sb,s15,'-k')
box,xlabel('s^b'),ylabel('s^1'),title('s^2<0,2s^b+2-s^2<m<2s^b+2')
